# Supplementary material
Source: publisher site journal article supplement (https://www.dovepress.com/article/233023)

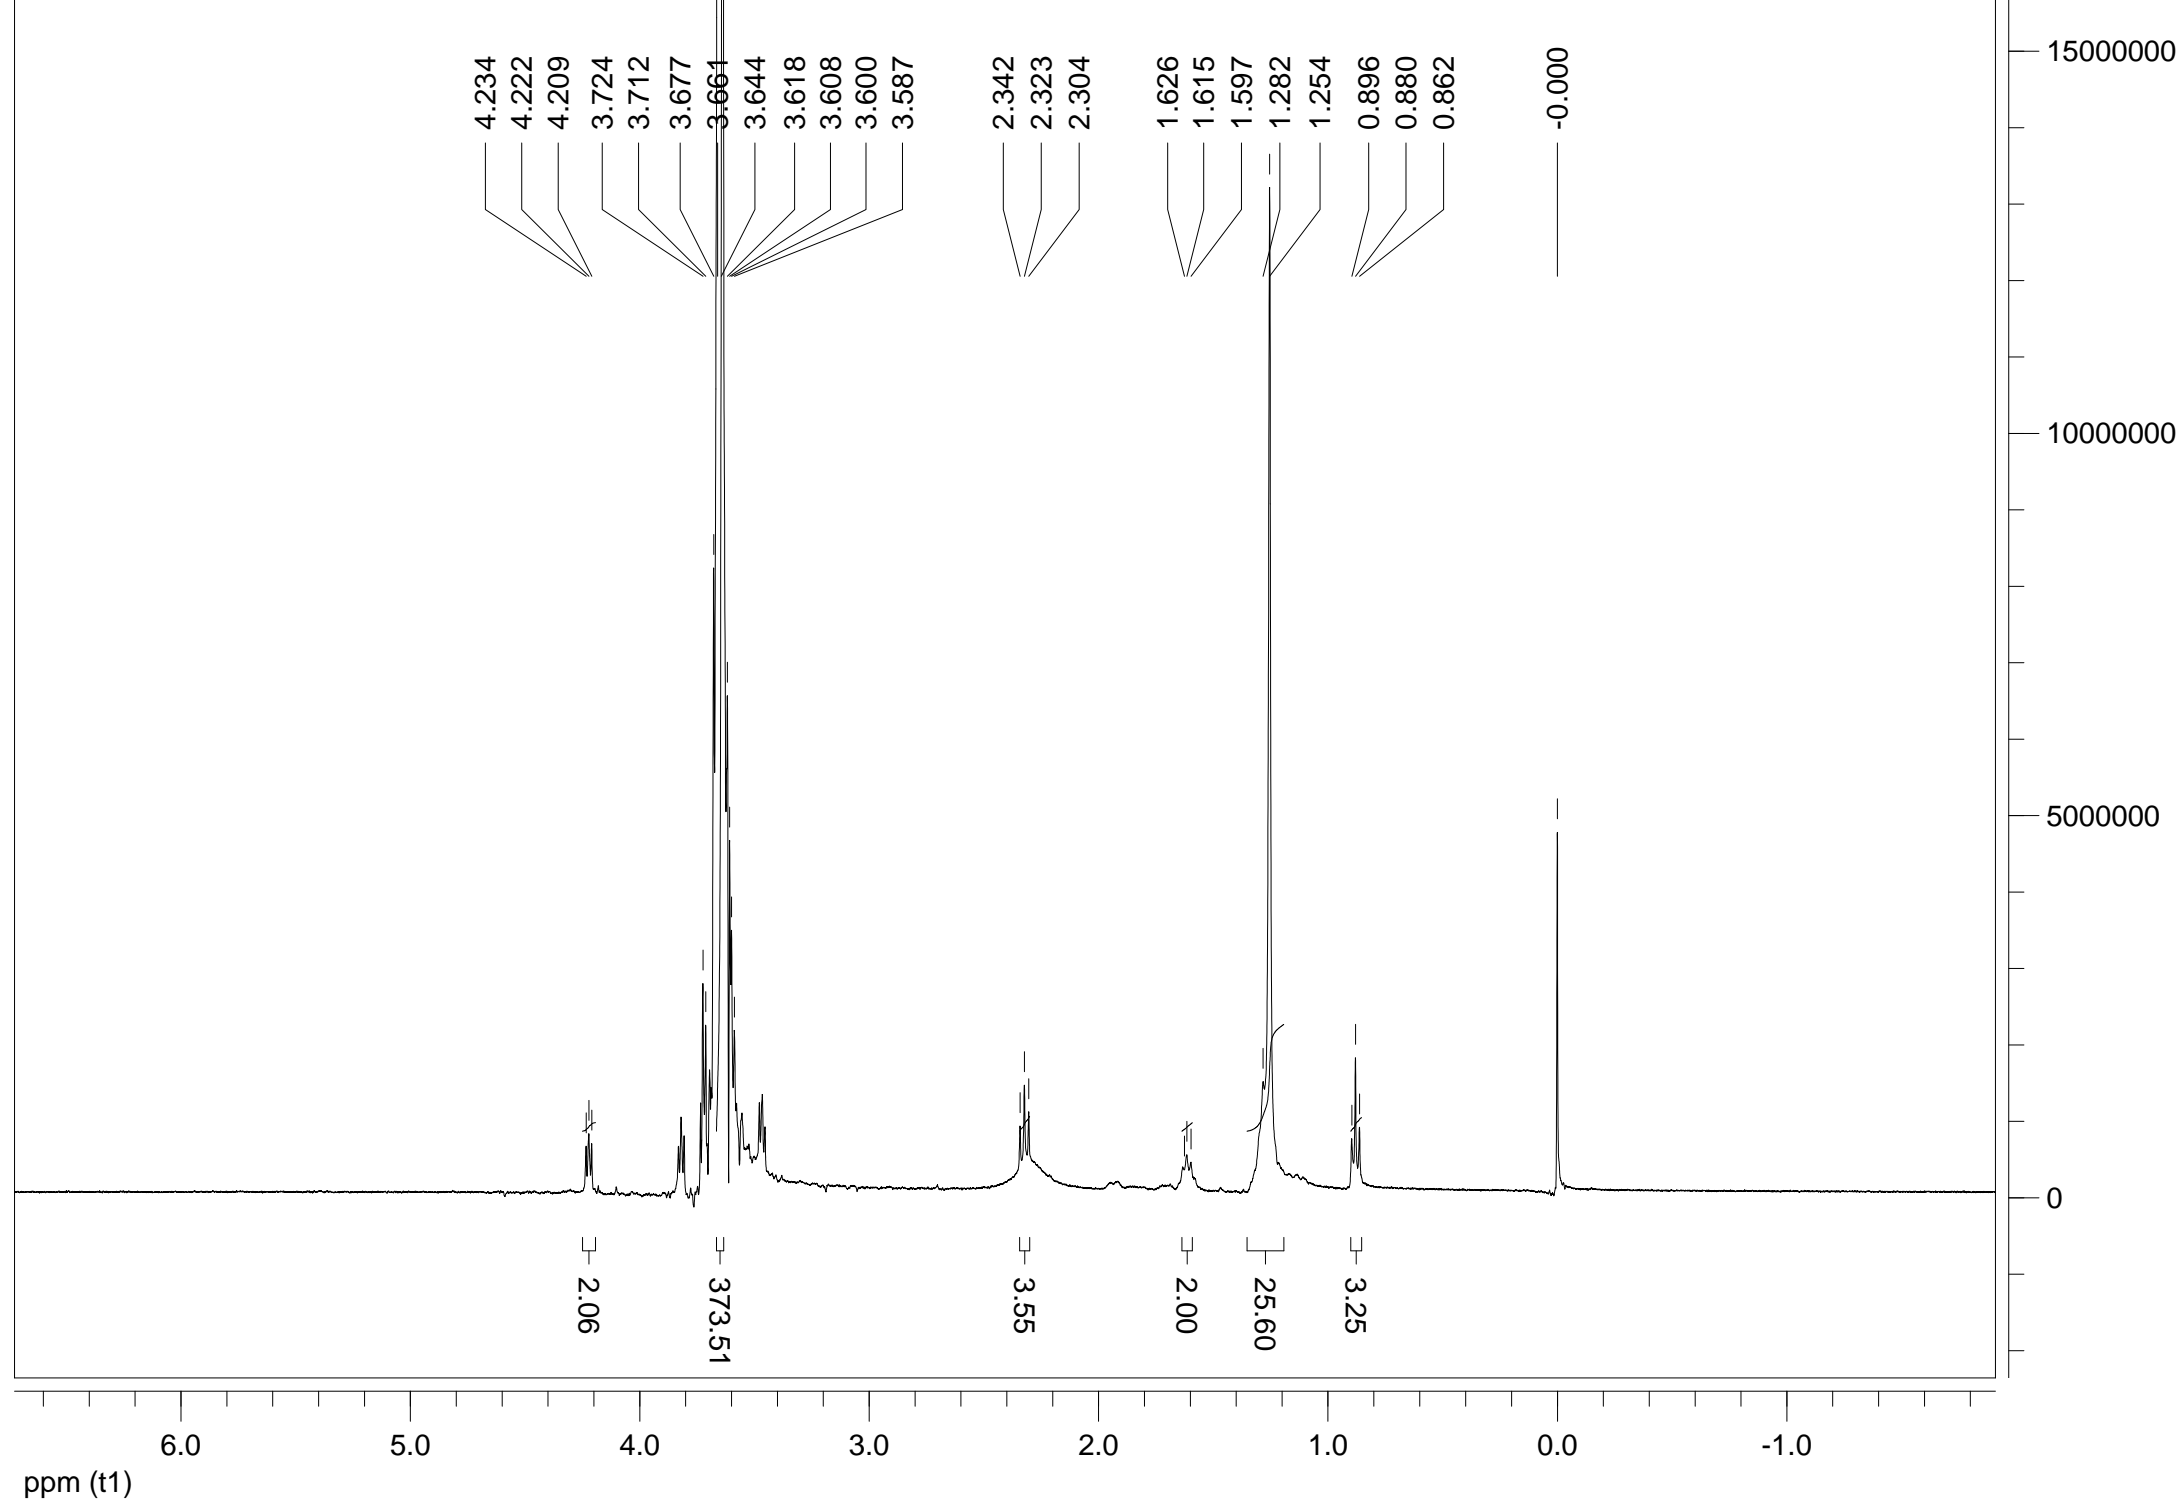

Fig. S1. <sup>1</sup>H-NMR spectra of SA-PEG<sup>2000</sup>.

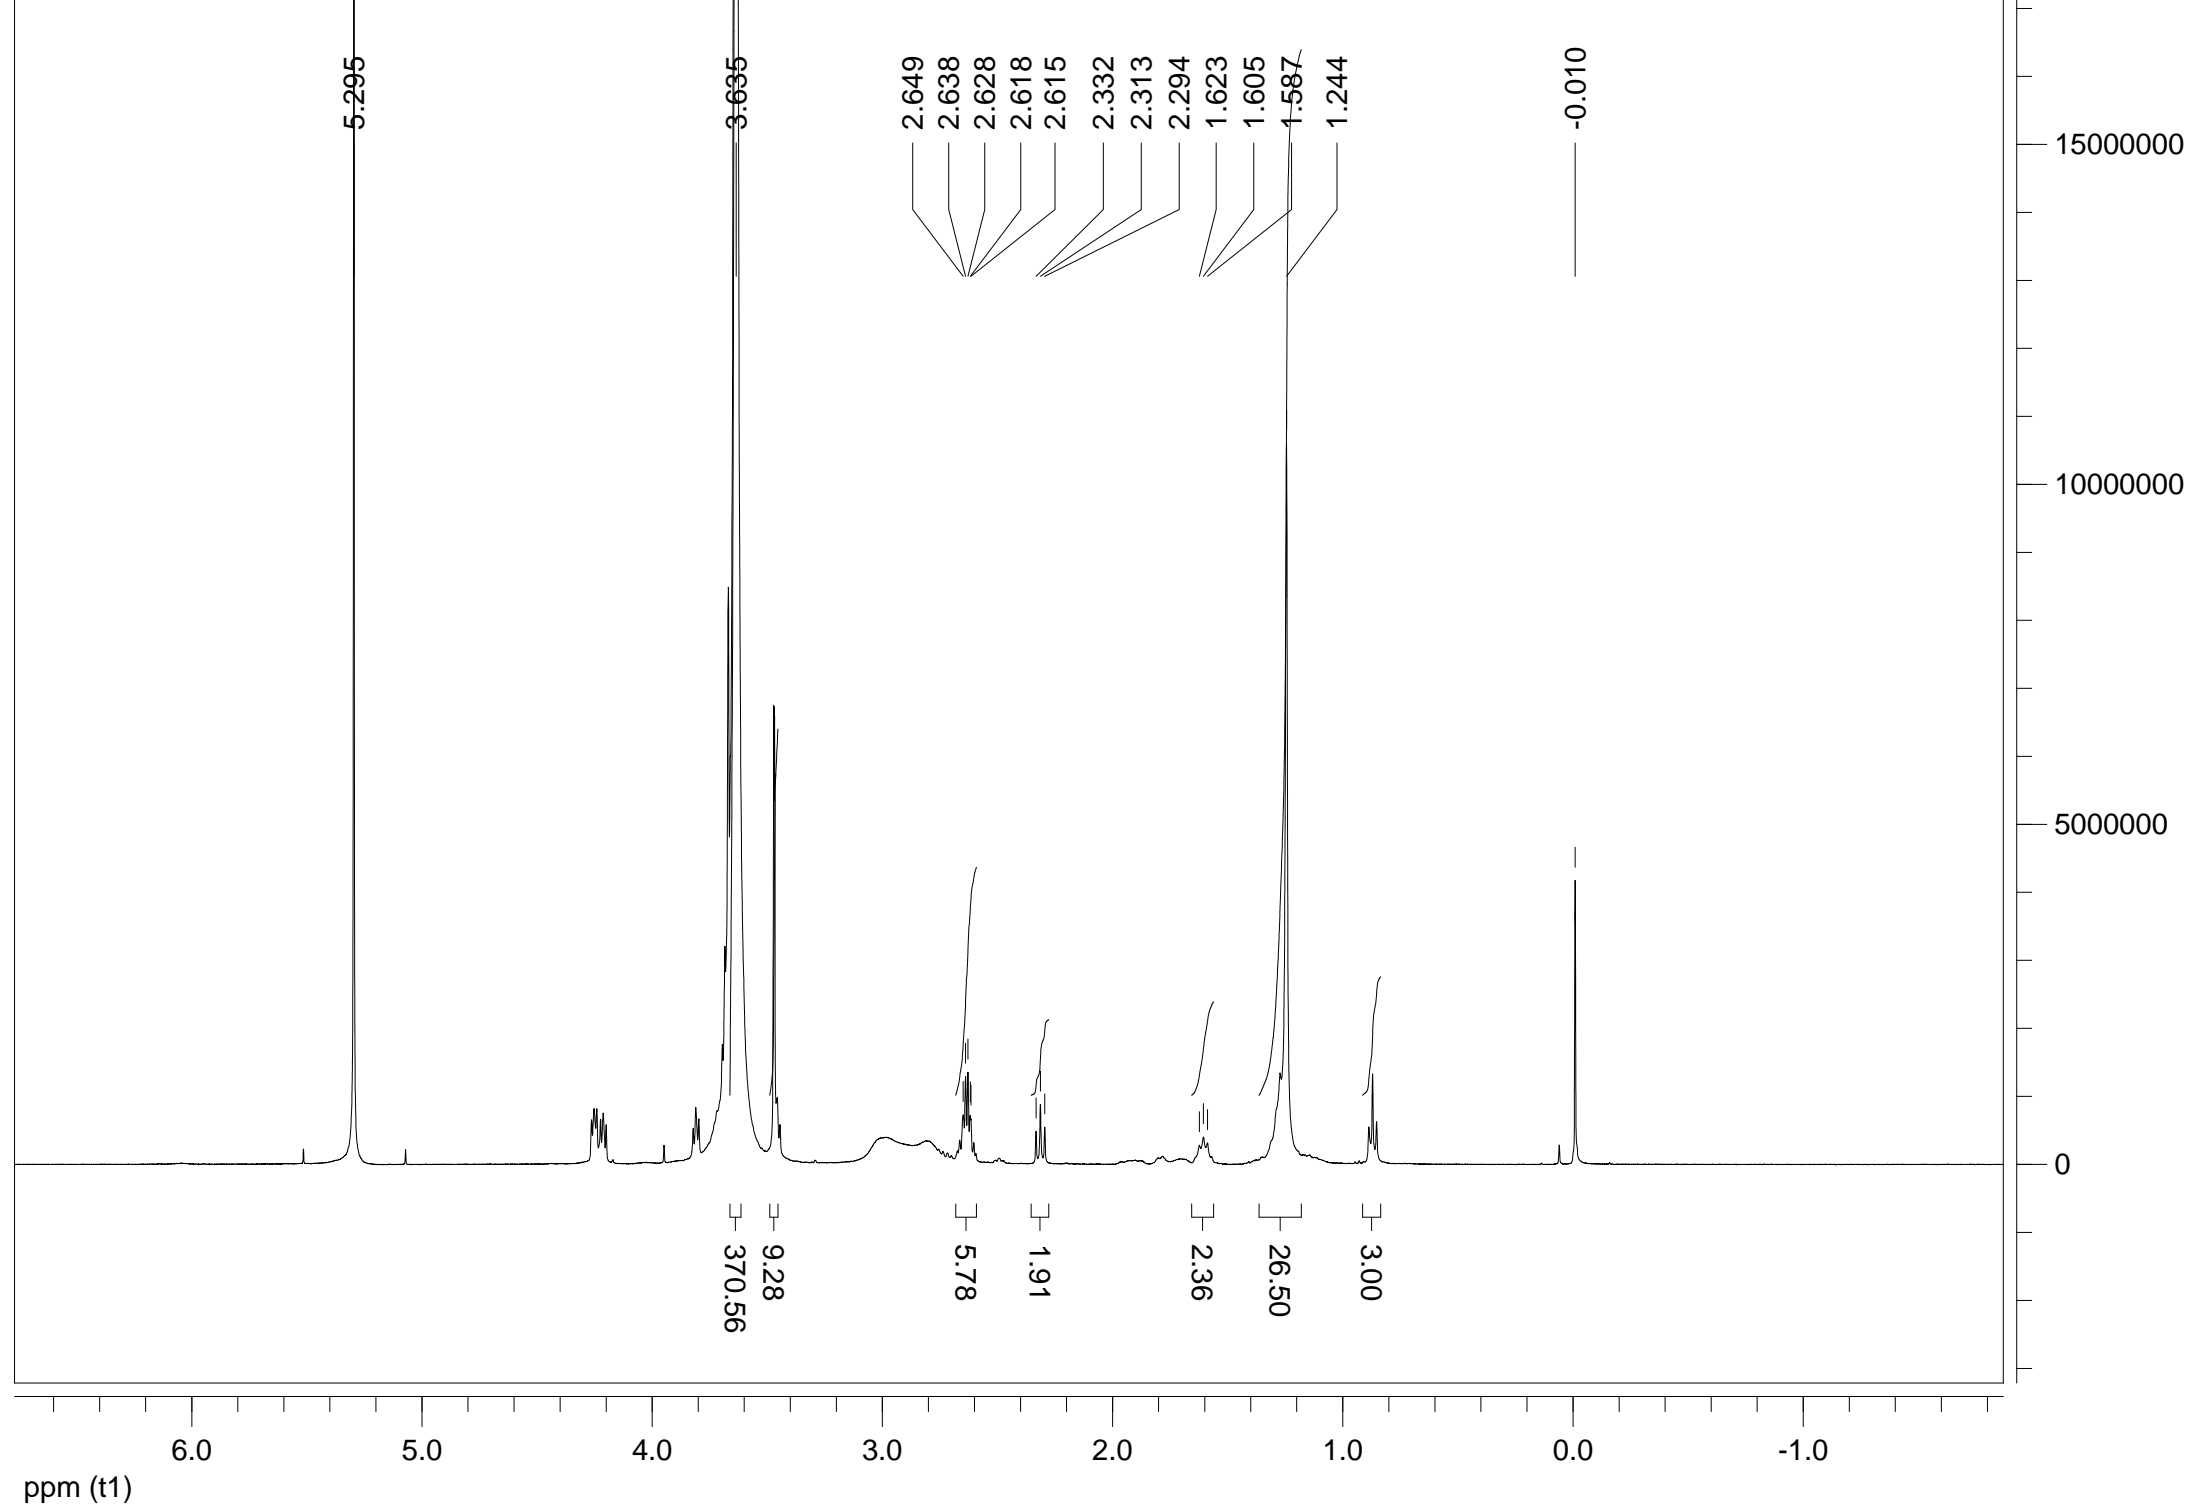

Fig. S2. <sup>1</sup>H-NMR spectra of SA-PEG<sub>2000</sub>-GX1

Supplement: Supplementary file 1 [file get_supplementary_file.php]
